# Supplementary figures and images for: Superhydrophobic 3-aminopropyltriethoxysilane modified graphene oxide graft copolymer/melamine sponge for efficient oil/water separation
Source: Royal Society of Chemistry journal article supplement (doi:10.1039/d5nj04053a), 2025-12-18

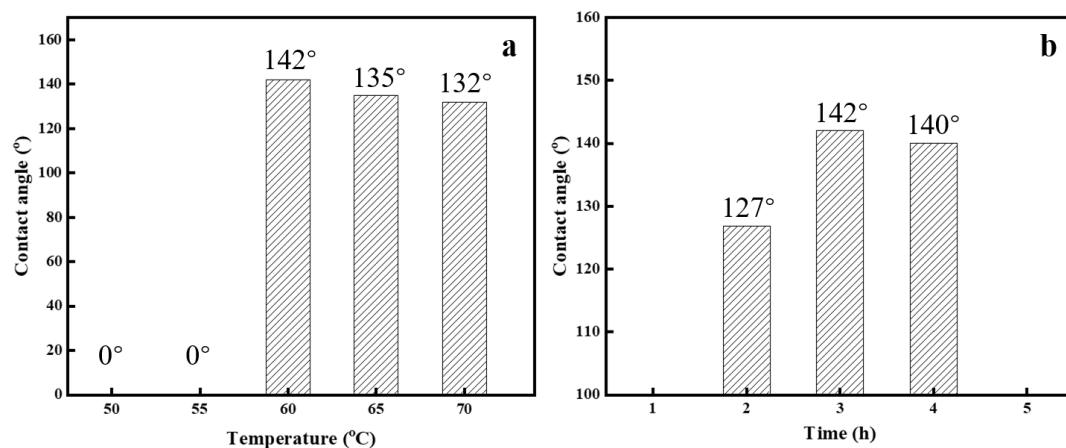

**Fig. S1** Effect of grafting reaction temperature (a) and time (b) on the contact angle of GO-g-PBA.

Supplement: d5nj04053a1.pdf [file d5nj04053a1.pdf]
